# Supplementary material for: A comprehensive characterization of the cell-free transcriptome reveals tissue- and subtype-specific biomarkers for cancer detection
Source: PubMed Central journal article supplement (PMC8060291; doi:10.1038/s41467-021-22444-1), 2021-04-21
Supplement: 41467_2021_22444_MOESM1_ESM.pdf [file 41467_2021_22444_MOESM1_ESM.pdf]

# Supplementary Materials

## Supplementary Information

### *Preanalytical testing*

We set out to determine the effect of different preanalytical factors on cfRNA in plasma, such as blood collection tube type, shipping temperature of blood tubes, long-term storage of plasma, and freeze-thaw cycles of plasma samples. Lysis of white blood cells (WBC) during sample collection, transport, and storage can confound gene expression estimates generated from RNA-seq, so we created a metric to measure the cfRNA fraction in any given sample and detect WBC lysis. We compared 7 paired WBC/cfRNA samples obtained from Discovery Life Sciences (Huntsville, AL). This sample set contains both cancer and healthy samples, and each sample set was enriched using our targeted RNA-seq assay using a custom panel of 508 cancer-related genes. Collapsed read counts were generated using STAR, and only genes targeted by the panel were considered. DESeq2 was used to identify differentially expressed genes controlling for patient effects. Only genes with a false discovery rate (FDR)  $<0.01$  and with a minimum 4 $\times$  expression change were considered. A total of 44 genes were found to be overexpressed in WBCs and 32 were found to be overexpressed in cfRNA. In each preanalytical study, the log-transform of the sum of the cfRNA-specific gene count for each sample was compared across conditions to determine the effect of different preanalytical parameters on cfRNA recovery.

### *Blood collection tube type*

We set out to compare preservation of cfRNA in blood collected in Streck cell-free DNA tubes (catalog # 218996) vs Streck cell-free RNA tubes (catalog # 218975). We collected 4 tubes of whole blood from each of 7 donors. Blood was drawn into two Streck RNA tubes and two Streck DNA tubes for each donor. Whole blood was processed to plasma, and the plasma pooled according to tube type (Streck RNA vs Streck DNA) across patients, creating two pooled plasma fractions. After pooling, the samples were aliquoted into 16 x 8 mL fractions (8 tubes Streck RNA plasma and 8 tubes Streck DNA plasma) and extracted in parallel using the QIAamp Circulating Nucleic Acid kit.

We prepared RNA-seq libraries for each aliquot of extracted cfRNA using the protocol described in the main text. RNA-seq libraries were enriched using a custom panel of 508 cancer-related genes, and each library was sequenced to saturation (~200M reads per sample). A comparison of collapsed gene counts for a given tube type provided a measure of assay reproducibility, while a comparison of collapsed gene counts across the different tube types provided a measure of tube-to-tube differences. Samples collected in the same tube type were more closely correlated with each other than with samples drawn in a different tube type (Supplementary Fig. 1), suggesting that technical replicates were highly reproducible, but that blood collection tube type affected the representation of transcripts in the cfRNA fraction.

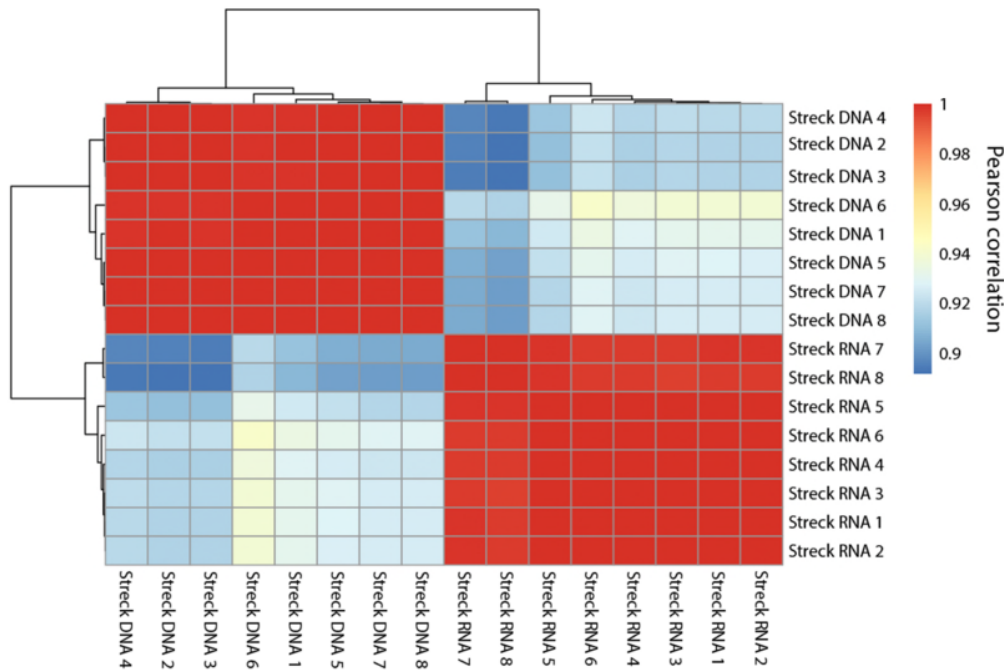

**Supplementary Fig. 1. Pairwise correlations as a function of blood collection tube type.**

Pairwise Pearson correlation of collapsed gene counts for samples collected in different blood collection tube types.

A differential expression analysis using DESeq2 indicated that 862 genes (of 63,664 total genes from Gencode v19 comprehensive gene annotation) were differentially expressed according to blood collection tube type ( $P < 0.01$ , as determined by DESeq2) (Supplementary Fig. 2a). In general, we found that blood-related transcripts, such as hemoglobin genes (*HBA1*, *HBA2*, *HBB*) were more highly expressed in samples collected in Streck RNA tubes compared to the samples collected in Streck DNA tubes, suggesting increased hemolysis in Streck RNA tubes (see highlighted genes in Supplementary Fig. 2b). The apparent increase of mitochondrial genes in Streck DNA tubes (Supplementary Fig. 2b) further supports this hypothesis, as red blood cells lack mitochondria, leading to a relative reduction in the normalized expression of mitochondrial genes in Streck RNA upon increased hemolysis.

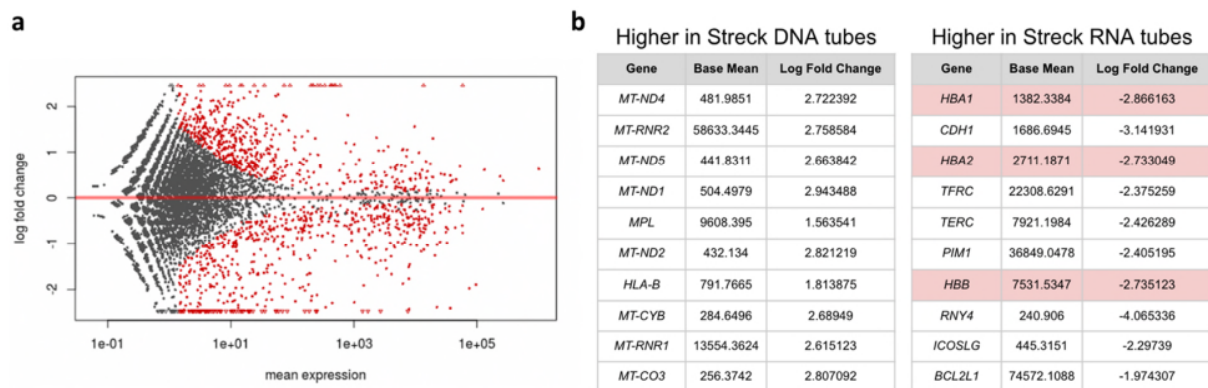

**Supplementary Fig. 2. Effect of blood collection tube type on cfRNA gene expression.** **a** Log fold change in expression as a function of blood collection tube. Differentially expressed genes ( $P < 0.01$ , as determined by DESeq2) are highlighted in red. **b** Top 10 differentially expressed genes by tube type. Hemoglobin genes are highlighted in red.

Motivated by these differences in gene expression, we analyzed the effect of blood collection tube type on both cfRNA-enriched genes and WBC-enriched genes and determined that samples collected in the Streck DNA tube had increased coverage for cfRNA genes (Supplementary Fig. 3a), and that samples collected in the Streck RNA tube had increased coverage for blood cell genes (Supplementary Fig. 3b). These results both support the conclusions of the individual gene expression analysis (i.e. that samples drawn into Streck DNA tubes show less evidence of hemolysis compared to samples collected in Streck RNA tubes) and validate our approach to measuring the effect of different preanalytical parameters through the analysis of specific gene sets. They also support our selection of the Streck DNA tubes for the preservation and analysis of cfRNA.

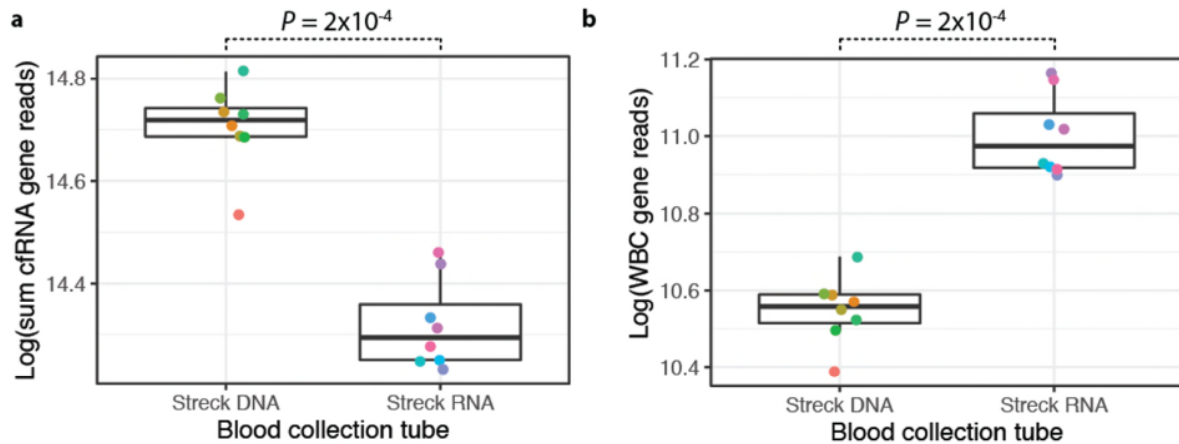

**Supplementary Fig. 3. Effect of blood collection tube type on cell-free RNA recovery from plasma.** The log transform of either **a** cfRNA-specific gene count or **b** WBC-specific gene count plotted as a function of blood collection tube type. 8 replicates (colored dots) are represented for each tube type.  $P$  values are calculated from the two-sided Wilcoxon rank-sum method. Boxplots indicate the 25% (lower hinge), 50% (horizontal line), and 75% quantiles (upper hinge), with whiskers that indicate observations outside the hinge  $\pm 1.5 \times$  interquartile range (IQR). Outliers (beyond  $1.5 \times$  IQR) are plotted individually.

#### *Shipping temperature of blood tubes*

Blood from 12 non-cancer donors ( $8 \times 10$  mL tube from each donor) was ordered from StemExpress and collected in Streck Cell Free DNA blood collection tubes and transported to GRAIL (Menlo Park, CA) via courier at ambient temperature within 4 hours of draw. On arrival at GRAIL, the tubes were held at  $22^\circ\text{C}$  until  $24 \pm 4$  hours had elapsed since the time of draw. The tubes were then randomized for draw order, divided into 4 groups, and held at the different temperatures ( $6^\circ\text{C}$ ,  $14^\circ\text{C}$ ,  $22^\circ\text{C}$ , and  $37^\circ\text{C}$ ) for 8 hours to simulate temperature excursions during transit. After 8 hours, all the tubes were returned to holding at  $22^\circ\text{C}$  until 48 hours had elapsed

since the time of draw, simulating the maximum shipping time for the majority of samples in the CCGA study. Plasma isolation began  $48 \pm 4$  hours after blood draw for all samples, at which point 2 aliquots of plasma from each donor were pooled and cell-free nucleic acid (cfNA) was extracted the same day using our standard protocol. The extracted cfNA was frozen and stored at  $-80^{\circ}\text{C}$ . The following day, cfNA was DNase treated and quantified using the High Sensitivity RNA Fragment Analyzer (Agilent), converted into DNA libraries, and enriched using our custom panel.

The log-transform of cfRNA-specific yield at each temperature was compared to the baseline temperature ( $22^{\circ}\text{C}$ ), with multiple hypothesis adjustment using Dunnett's test. A significant difference was observed in cfRNA-specific gene count between  $37^{\circ}\text{C}$  and  $22^{\circ}\text{C}$ : there was ~28% decrease in yield at  $37^{\circ}\text{C}$  (95% confidence interval [CI], 4.5-48%), suggesting a loss of cfRNA material at high temperatures. There was no significant change in cfRNA yield at lower temperatures ( $6^{\circ}\text{C}$  and  $14^{\circ}\text{C}$ ) compared to  $22^{\circ}\text{C}$ .

Based on this result, we repeated the study with 12 non-cancer donors ( $8 \times 10$  mL tube from each donor), but changed the temperature excursions to  $30^{\circ}\text{C}$ ,  $33^{\circ}\text{C}$ , and  $35^{\circ}\text{C}$  for 4 hours to better simulate real-world high-temperature excursions during shipping. This study showed that there was no statistically significant difference in cfRNA coverage up to  $33^{\circ}\text{C}$ , but that coverage increased slightly at  $35^{\circ}\text{C}$  (34% increase [95% CI, 0.7-78%]). The increase in coverage at  $35^{\circ}\text{C}$ , compared to the decrease in coverage at  $37^{\circ}\text{C}$  in the first shipping temperature study, is likely due to batch effects for cfRNA extraction and processing, which were performed on a later date by a different set of clinical operators.

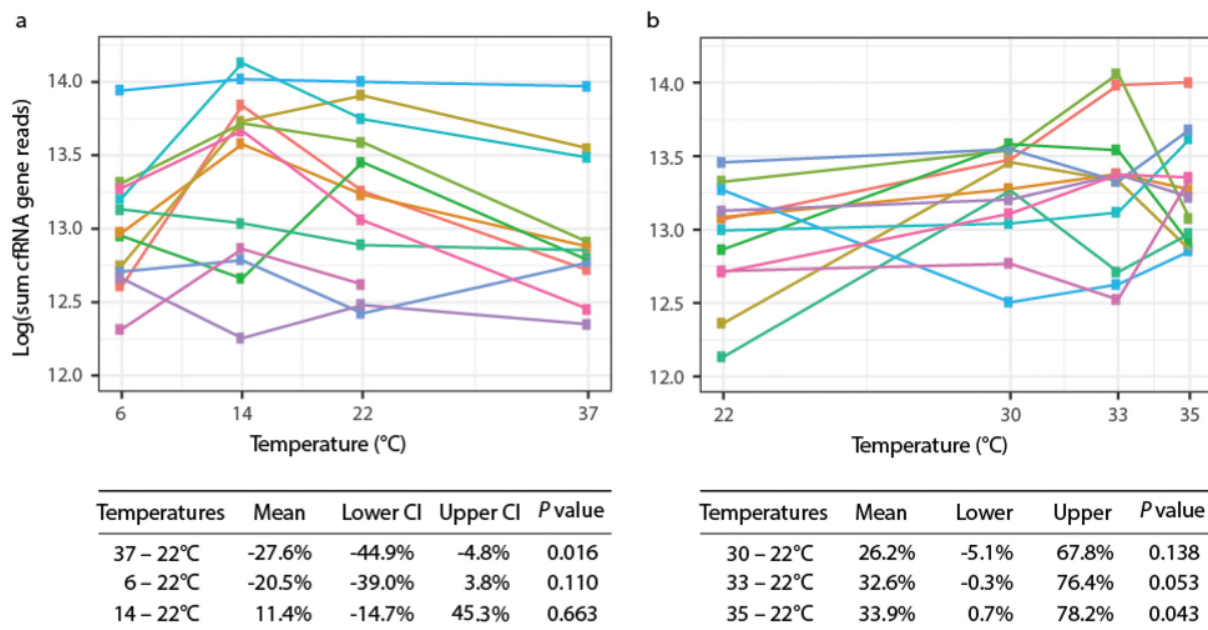

**Supplementary Fig. 4. Effect of shipping temperature on cell-free RNA recovery from plasma.** The log-transform of the cfRNA-specific gene count for each patient (n=12) was compared across temperatures ranging between **a** 6 to 37°C and **b** 22 to 35°C. Each colored line represents a single non-cancer donor. Mean and 95% confidence interval limits (lower and upper CI) for percent change in the log-transform of cfRNA-specific gene count between the test conditions and the reference condition (22°C) are shown in the tables below the graphs. *P* values were determined using Dunnett’s test. cfRNA, cell-free RNA.

#### *Long-term plasma storage*

Plasma from 84 non-cancer CCGA donors were used to evaluate the effects of extended plasma storage on cfRNA. Samples from 3 sets of subjects (groups 1, 2, and 3) collected approximately 0, 3, and 6 months ( $\pm 28$  days) from the start of the experiment were used for the study. Each set consisted of 28 subjects, and each subject had 6 tubes available to facilitate testing over 3 time

points with 2 tubes per time point. Samples from each set were processed at 0 months, 3 months, and 6 months. This approach allowed for assessment of cfRNA stability up to 12 months.

At each time point, 2 tubes of plasma for each of 84 subjects were removed from storage at  $-80^{\circ}\text{C}$ , thawed, extracted, and DNase treated using our standard protocol. Each cfRNA sample was run on the Fragment Analyzer to assess the extraction yield and fragment length integrity of the cfRNA, converted into DNA libraries, and enriched through a custom targeted panel. We modeled the effect of plasma storage on the log-transformed cfRNA-enriched count using a mixed-effects regression model where storage time was designed as a fixed effect and the patient is designated as a random effect. Storage time did not have a significant effect on cfRNA-specific gene counts over 12 months in storage (Supplementary Fig. 5).



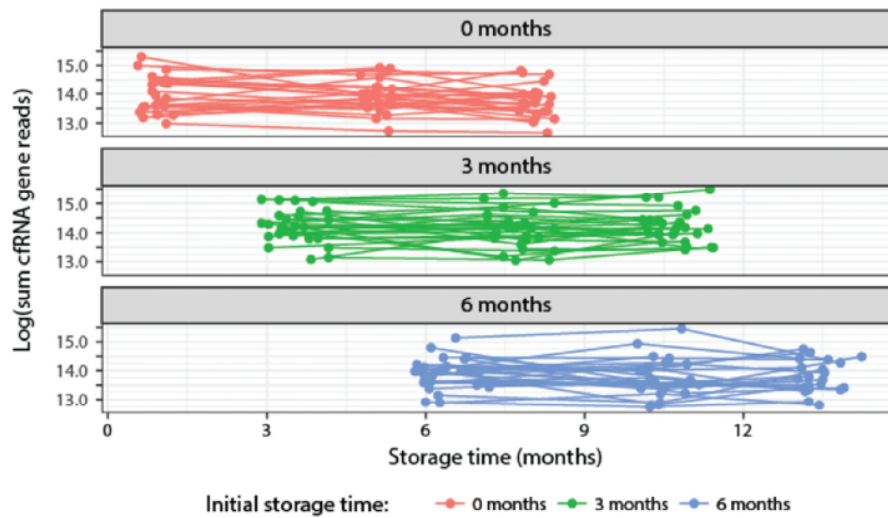

| Storage group        | Mean   | Lower CI | Upper CI | P value |
|----------------------|--------|----------|----------|---------|
| Grp1_3mo – Grp1_0mo  | -4.9%  | -26.5%   | 23.0%    | 0.996   |
| Grp1_6mo – Grp1_0mo  | -18.6% | -37.3%   | 5.7%     | 0.191   |
| Grp2_3mo – Grp1_0mo  | 25.0%  | -16.5%   | 87.1%    | 0.550   |
| Grp2_6mo – Grp1_0mo  | 19.4%  | -20.2%   | 78.6%    | 0.767   |
| Grp2_9mo – Grp1_0mo  | 29.6%  | -13.4%   | 94.0%    | 0.388   |
| Grp3_6mo – Grp1_0mo  | -9.4%  | -39.5%   | 35.6%    | 0.983   |
| Grp3_9mo – Grp1_0mo  | -21.2% | -47.7%   | 18.9%    | 0.502   |
| Grp3_12mo – Grp1_0mo | -16.6% | -45.1%   | 26.9%    | 0.779   |

**Supplementary Fig. 5. Effect of plasma storage on cell-free RNA recovery.** Sample groups 1, 2, and 3 each consist of a distinct set of 28 subjects from whom blood was collected at different times (0, 3, and 6 months, respectively) at the start of the study. Group 1 donors are sampled at 0, 3, and 6 months from the date of collection. Group 2 donors are sampled at 3, 6, and 9 months from the date of collection. Group 3 donors are sampled at 6, 9, and 12 months from the date of collection. Mean and 95% confidence interval limits (lower and upper CI) for percent change in the log-transform of cfRNA-specific gene count between storage subgroups and the reference group (Grp1\_0mos) are shown in the table below the graph. *P* values were determined using Dunnett's test. cfRNA, cell-free RNA.

### *Freeze-thaw cycles*

Plasma samples from 14 healthy donors were collected to evaluate the effects of freeze-thaw cycles on cfRNA for performance in a targeted enrichment assay. Twelve tubes of blood were collected from each donor in Streck cfDNA blood collection tubes. On arrival at GRAIL, plasma was pooled within donor and re-aliquoted into 6 replicates per donor. We tested 3 conditions: fresh (no freeze-thaw cycle), 1 freeze-thaw cycle, and 2 freeze-thaw cycles. Each of the 14 donors had 2 experimental replicates per condition. Two replicates were immediately extracted and DNase treated for the fresh condition. The remaining 4 replicates went through freeze-thaw cycles during which they were frozen at  $-80^{\circ}\text{C}$  for 24 hours then thawed at room temperature before extraction. Each cfRNA sample was run on the Fragment Analyzer to assess the extraction yield and fragment length integrity of the cfRNA, converted into DNA libraries, and enriched through a targeted panel.

A Dunnett's comparison, where freshly extracted plasma serves as the control, shows that a single freeze-thaw cycle does not result in a statistically significant drop in cfRNA-specific gene coverage ( $P=0.467$ ). However, there is a statistically significant drop in cfRNA-enriched count when comparing 2 freeze-thaw cycles with freshly extracted plasma ( $P<10^{-10}$ ). The percent change in cfRNA-enriched count for 2 freeze-thaw cycles is  $-33.3\%$  (95% CI,  $-39.5\%$  to  $-26.4\%$ ).

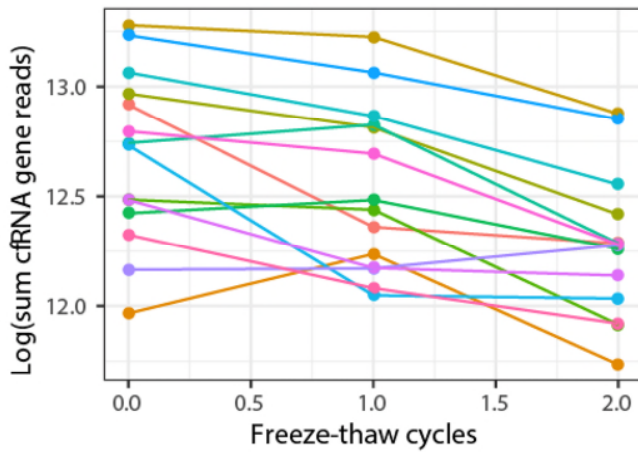

| Freeze-thaw group | Mean   | Lower CI | Upper CI | <i>P</i> value |
|-------------------|--------|----------|----------|----------------|
| FT1 – Fresh       | -4.6%  | -14.0%   | 5.7%     | 0.498          |
| FT2 – Fresh       | -33.3% | -41.7%   | -23.7%   | <0.001         |

**Supplementary Fig. 6. Effect of freeze-thaw cycles on cell-free RNA recovery from plasma.**

The log-transform of the cfRNA-specific gene count for each patient (n=14) was compared across freeze-thaw cycles. Each colored line represents a single non-cancer donor. Mean and 95% confidence interval limits (lower and upper CI) for percent change in the log-transform of cfRNA-specific gene count between samples with 1 or 2 freeze-thaw cycles (FT1 or FT2) and samples without freeze-thaw (“Fresh”) are shown in the table below the graph. *P* values were determined using Dunnett’s test. cfRNA, cell-free RNA.

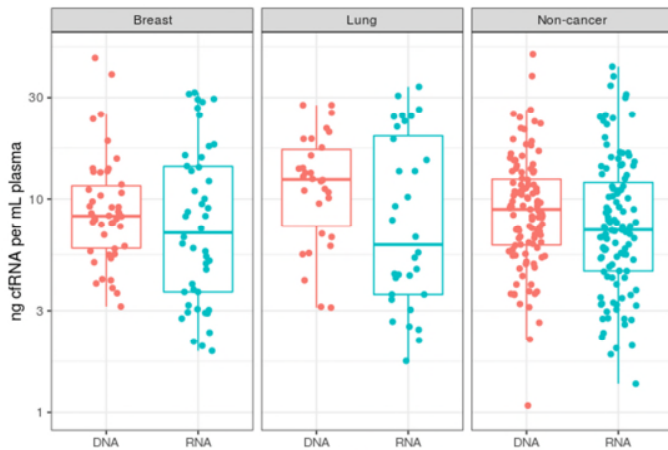

**Supplementary Fig. 7. Cell-free DNA and RNA yields by cancer type.** Extraction yields from matched plasma sets from patients with cancer (n=47 breast, left panel; n=32 lung, center panel) or without cancer (n=112, right panel). Boxplots indicate the 25% (lower hinge), 50% (horizontal line), and 75% quantiles (upper hinge), with whiskers that indicate observations outside the hinge  $\pm 1.5 \times$  interquartile range (IQR). Outliers (beyond  $1.5 \times$  IQR) are plotted individually.

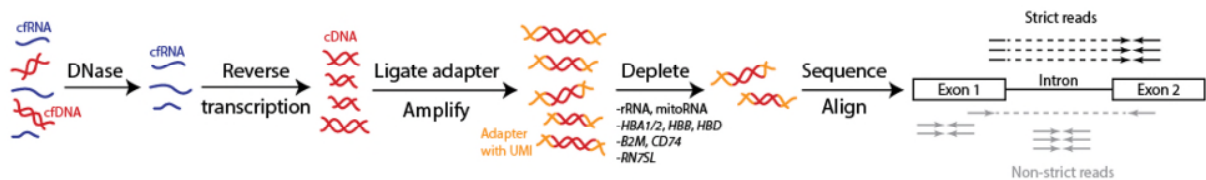

**Supplementary Fig. 8. Whole-transcriptome library generation and quantification.** The workflow for cfRNA library preparation and gene expression quantification through the use of “strict reads.” cDNA, complementary DNA; cfDNA, cell-free DNA; cfRNA, cell-free RNA; DNase, deoxyribonuclease; HB, hemoglobin; mitoRNA, mitochondrial RNA; UMI, unique molecular identifier.

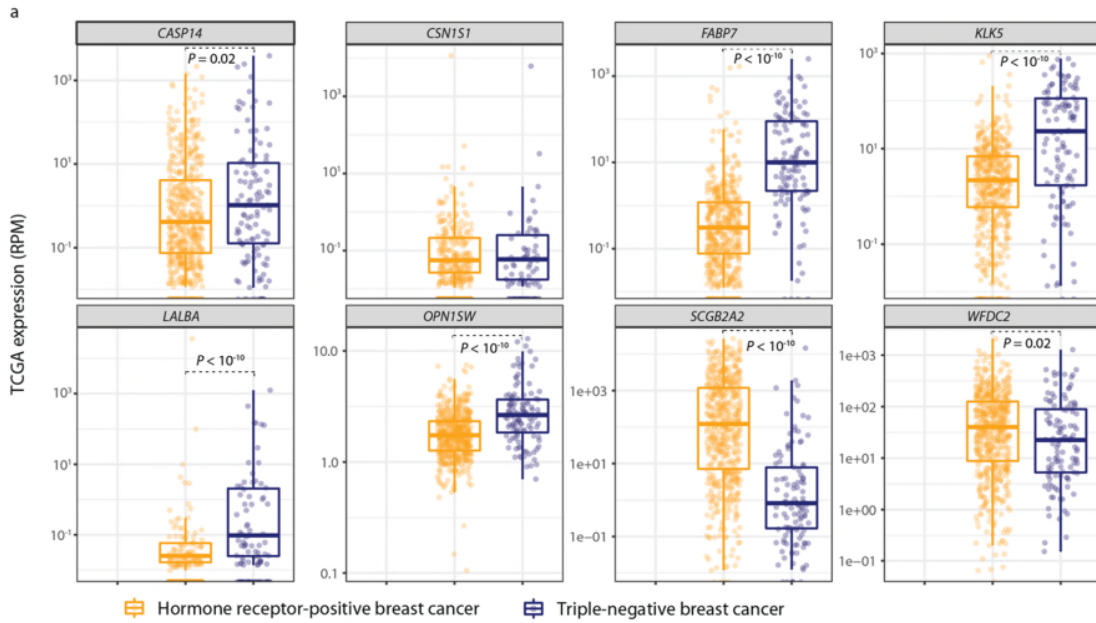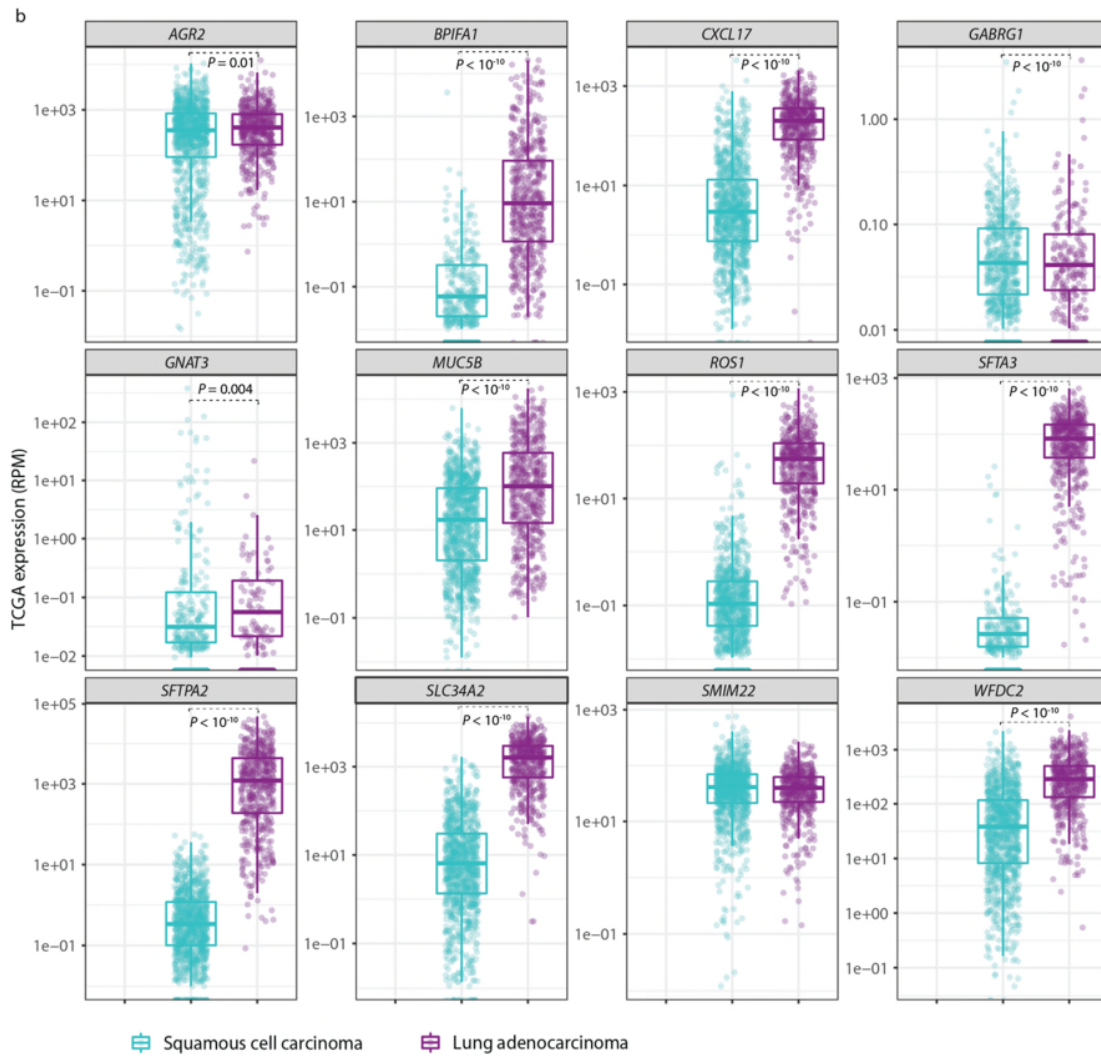

**Supplementary Fig. 9. Subtype specificity of dark channel biomarker (DCB) genes.**

Expression of tissue-specific DCB genes in TCGA tissue samples across **a** breast cancer subtypes (n=575 HR+, n=115 triple-negative) and **b** lung cancer subtypes (n=1102 squamous cell carcinoma, n=533 adenocarcinoma). *P* values from the two-sided Wilcoxon rank-sum method indicate significance levels for differential expression between cancer subtypes. Boxplots indicate the 25% (lower hinge), 50% (horizontal line), and 75% quantiles (upper hinge), with whiskers that indicate observations outside the hinge  $\pm 1.5 \times$  interquartile range (IQR). Outliers (beyond  $1.5 \times$  IQR) are plotted individually. RPM, reads per million; TCGA, The Cancer Genome Atlas.

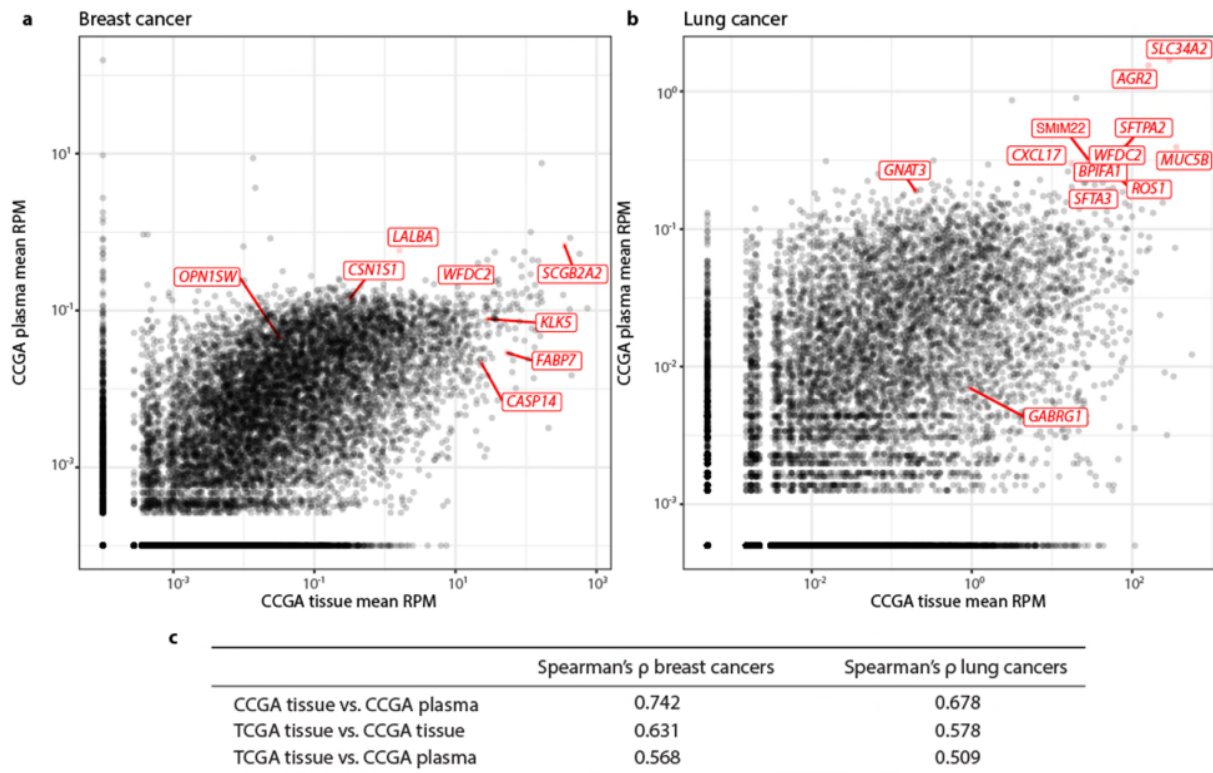

**Supplementary Fig. 10. Dark channel biomarker gene expression levels in plasma are correlated with tumor tissue expression.** Correlation of cfRNA gene expression with RNA expression in matched tumor tissue for patients with **a** breast and **b** lung cancer. **c** Spearman's correlation of gene expression between different sample types. CCGA, Circulating Cell-free Genome Atlas study (NCT02889978); cfRNA, cell-free RNA; RPM, reads per million; TCGA, The Cancer Genome Atlas.

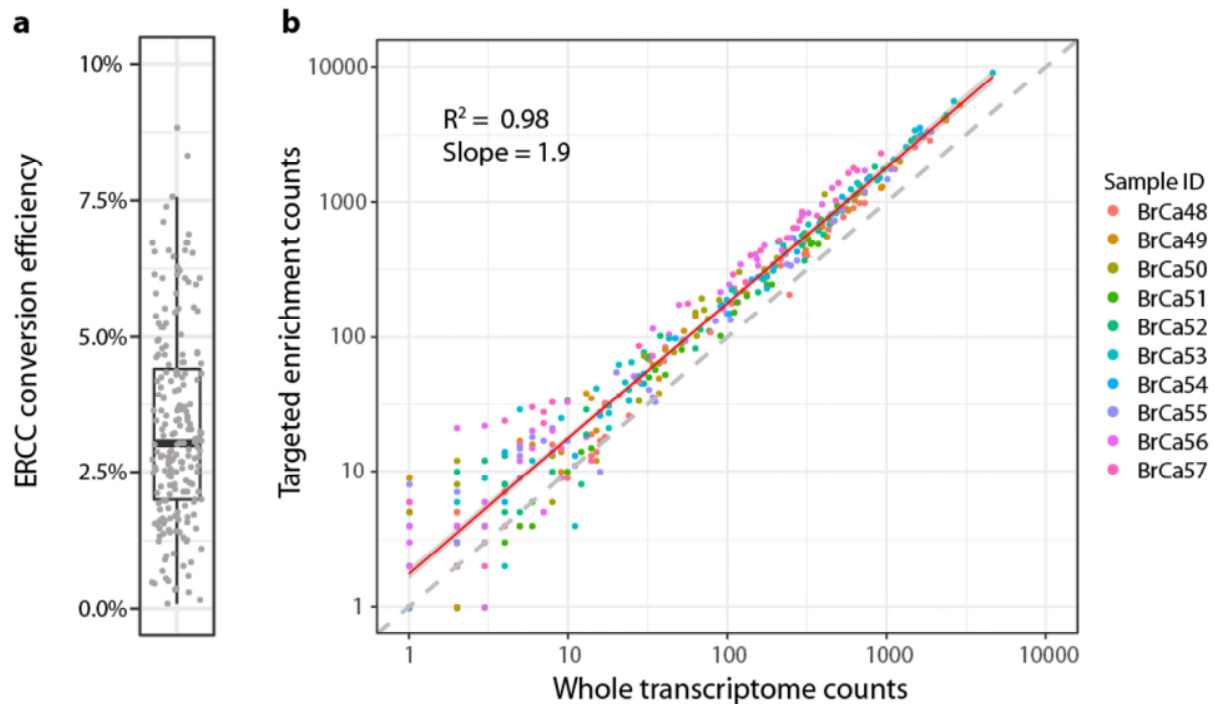

**Supplementary Fig. 11. Conversion efficiency for different sequencing library preparation strategies.** **a** The conversion efficiency of each sample ( $n=165$ , gray circles) in the whole-transcriptome discovery cohort was monitored using ERCC spike-ins. The mean (SD) conversion efficiency for the whole-transcriptome assay was  $4 \pm 3\%$ . Boxplot indicates the 25% (lower hinge), 50% (horizontal line), and 75% quantiles (upper hinge), with whiskers that indicate observations outside the hinge  $\pm 1.5 \times$  interquartile range (IQR). Outliers (beyond  $1.5 \times$  IQR) are plotted individually. **b** Comparison of strict counts for the targeted enrichment and whole-transcriptome assays for genes within the targeted panel, using a subset of 10 individuals from the breast cancer (BrCa) group of the validation cohort. A linear regression model (red line) showed a 2-fold increase in counts detected with the targeted enrichment assay. The identity line is shown as a dashed grey line. ERCC, External RNA Controls Consortium; SD, standard deviation.



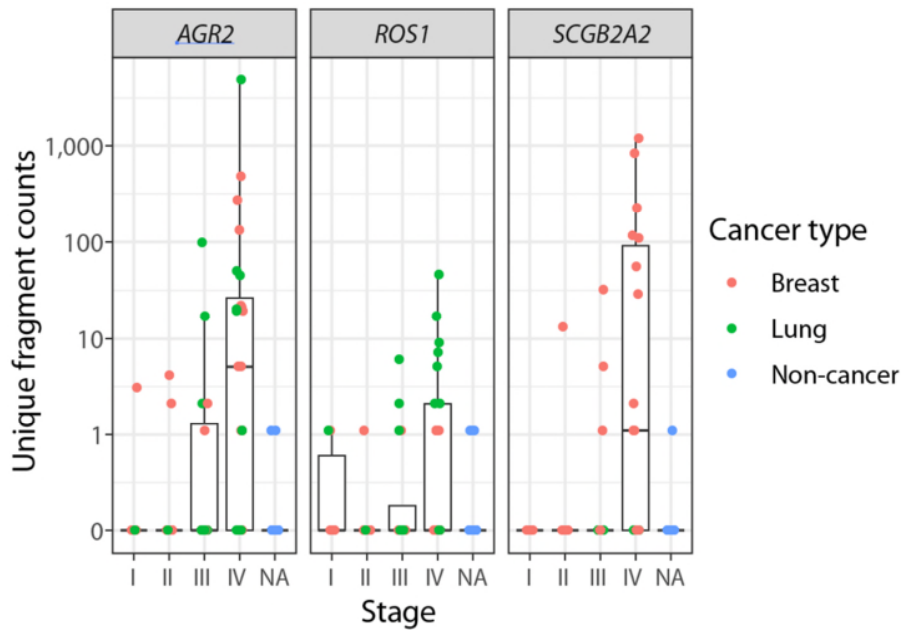

**Supplementary Fig. 12. Dark channel biomarker (DCB) expression levels in plasma increase with cancer stage.** The number of unique fragment counts for 3 dark channel biomarker (DCB) genes in patients from the validation cohort organized by cancer stage. Solid circles represent individual patients and colors denote cancer type. Data represents 37 breast cancer patients (stages I [5], II [8], III [9], IV [15]), 18 lung cancer patients (stages I [1], II [1], III [7], IV [9]), and 32 non-cancer patients. *AGR2* is present in both breast and lung cancer plasma samples, *ROS1* is specific to lung cancer, and *SCGB2A2* is specific to breast cancer. NA, not available. Boxplots indicate the 25% (lower hinge), 50% (horizontal line), and 75% quantiles (upper hinge), with whiskers that indicate observations outside the hinge  $\pm 1.5 \times$  interquartile range (IQR). Outliers (beyond  $1.5 \times$  IQR) are plotted individually.

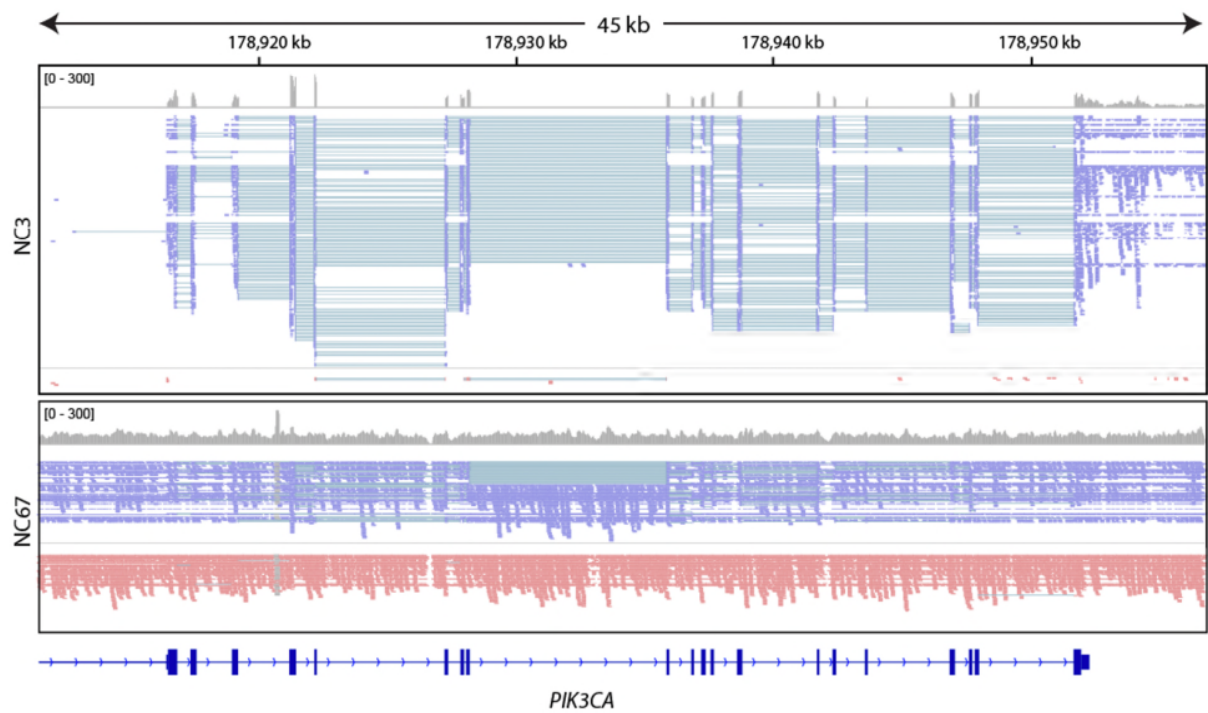

**Supplementary Fig. 13. Evidence of DNA contamination in RNA-seq libraries.** Reads mapping across a 45kb region of *PIK3CA*, a high-abundance cell-free RNA gene, in a low (NC3, top panel) and high (NC67, bottom panel) DNA contamination sample. Sense (blue) and anti-sense (red) reads are shown. Reads mapping across an intron are connected by a cyan line.

## Supplementary Tables

**Supplementary Table 1. Sample summary for circulating cell-free genome atlas study discovery cohort**

| <b>Sample Type</b> | <b>cfRNA (Pass QC)</b> | <b>Tissue (Pass QC)</b> |
|--------------------|------------------------|-------------------------|
| Breast cancer      | 47 (46)                | 40 (40)                 |
| Lung cancer        | 32 (30)                | 12 (12)                 |
| Non-cancer         | 93 (89)                | 0                       |
| <b>Total</b>       | <b>172 (165)</b>       | <b>52 (52)</b>          |

cfRNA, cell-free RNA; QC, quality control.

**Supplementary Table 2. Patient demographics for circulating cell-free genome atlas study discovery cohort**

|                     | <b>Breast cancer</b>                                                                   | <b>Lung cancer</b>                                                                                                   | <b>Non-cancer</b> |
|---------------------|----------------------------------------------------------------------------------------|----------------------------------------------------------------------------------------------------------------------|-------------------|
| N                   | 47                                                                                     | 32                                                                                                                   | 93                |
| Subtype             | 25 HR+ (14 HR+/HER2-,<br>11 HR+/HER2+),<br>5 HR-/HER2+,<br>14 TNBC,<br>3 other/missing | 11 adenocarcinoma,<br>10 squamous cell<br>carcinoma,<br>9 small cell lung cancer,<br>1 carcinoid,<br>1 other/missing |                   |
| Age, y (median/IQR) | 53 (41-60)                                                                             | 66 (60-73)                                                                                                           | 62 (55-69)        |
| % Female            | 100%                                                                                   | 56%                                                                                                                  | 73%               |
| % Current smoker    | 2%                                                                                     | 34%                                                                                                                  | 8%                |
| % Former smoker     | 34%                                                                                    | 63%                                                                                                                  | 38%               |
| % Non-smoker        | 64%                                                                                    | 3%                                                                                                                   | 55%               |

HR, hormone receptor; HER2, human epidermal growth factor receptor-2; IQR, interquartile range; TNBC, triple-negative breast cancer.

**Supplementary Table 3. Sample summary for circulating cell-free genome atlas study validation cohort**

| <b>Stage</b> | <b>Breast Cancer<br/>(Pass QC)</b> | <b>Lung Cancer<br/>(Pass QC)</b> | <b>Age-Matched Non-Cancer<br/>(Pass QC)</b> |
|--------------|------------------------------------|----------------------------------|---------------------------------------------|
| I            | 5 (5)                              | 1 (1)                            | NA                                          |
| II           | 8 (7)                              | 1 (1)                            | NA                                          |
| III          | 10 (8)                             | 7 (7)                            | NA                                          |
| IV           | 15 (15)                            | 9 (9)                            | NA                                          |
| <b>Total</b> | <b>38 (35)</b>                     | <b>18 (18)</b>                   | <b>32 (31)</b>                              |

NA, not available; QC, quality control.

**Supplementary Table 4. Patient demographics for circulating cell-free genome atlas study validation cohort**

|                          | <b>Breast Cancer</b> | <b>Lung Cancer</b> | <b>Age-Matched Non-Cancer</b> |
|--------------------------|----------------------|--------------------|-------------------------------|
| N                        | 38                   | 18                 | 32                            |
| Age, y (Median/IQR)      | 58 (40.5-75.5)       | 63.5 (54-73)       | 58 (40.25-75.75)              |
| % Female                 | 100%                 | 67%                | 87.5%                         |
| % Current smoker         | 8%                   | 22%                | 3%                            |
| % Former smoker          | 21%                  | 61%                | 22%                           |
| % Non-smoker             | 71%                  | 17%                | 72%                           |
| % Smoking status unknown | —                    | —                  | 3%                            |

IQR, interquartile range.

**Supplementary Table 5. List of study participants**

| <b>Sample ID</b> | <b>Smoking Status</b> | <b>Subtype</b> | <b>Matched tissue</b> | <b>QC</b> | <b>Cohort</b>    |
|------------------|-----------------------|----------------|-----------------------|-----------|------------------|
| BrCa1            | Former smoker         | HR-/HER2+      | Not Available         | Passed    | Discovery (CCGA) |
| BrCa2            | Non-smoker            | TNBC           | Available             | Passed    | Discovery (CCGA) |
| BrCa3            | Non-smoker            | HR+/HER2+      | Available             | Passed    | Discovery (CCGA) |
| BrCa4            | Non-smoker            | TNBC           | Not Available         | Passed    | Discovery (CCGA) |
| BrCa5            | Former smoker         | HR+/HER2+      | Available             | Passed    | Discovery (CCGA) |
| BrCa6            | Non-smoker            | HR+/HER2-      | Available             | Failed    | Discovery (CCGA) |
| BrCa7            | Non-smoker            | Other/missing  | Available             | Passed    | Discovery (CCGA) |
| BrCa8            | Non-smoker            | HR+/HER2-      | Available             | Passed    | Discovery (CCGA) |
| BrCa9            | Non-smoker            | HR+/HER2-      | Available             | Passed    | Discovery (CCGA) |
| BrCa10           | Non-smoker            | HR-/HER2+      | Available             | Passed    | Discovery (CCGA) |
| BrCa11           | Former smoker         | Other/missing  | Available             | Passed    | Discovery (CCGA) |
| BrCa12           | Non-smoker            | TNBC           | Available             | Passed    | Discovery (CCGA) |
| BrCa13           | Non-smoker            | TNBC           | Available             | Passed    | Discovery (CCGA) |
| BrCa14           | Former smoker         | TNBC           | Not Available         | Passed    | Discovery (CCGA) |
| BrCa15           | Former smoker         | TNBC           | Available             | Passed    | Discovery (CCGA) |
| BrCa16           | Non-smoker            | HR-/HER2+      | Available             | Passed    | Discovery (CCGA) |
| BrCa17           | Non-smoker            | HR+/HER2+      | Available             | Passed    | Discovery (CCGA) |
| BrCa18           | Non-smoker            | HR+/HER2-      | Available             | Passed    | Discovery (CCGA) |
| BrCa19           | Non-smoker            | HR+/HER2-      | Available             | Passed    | Discovery (CCGA) |
| BrCa20           | Non-smoker            | TNBC           | Not Available         | Passed    | Discovery (CCGA) |

|        |                |               |               |        |                  |
|--------|----------------|---------------|---------------|--------|------------------|
| BrCa21 | Non-smoker     | HR+/HER2-     | Available     | Passed | Discovery (CCGA) |
| BrCa22 | Current smoker | HR+/HER2+     | Available     | Passed | Discovery (CCGA) |
| BrCa23 | Non-smoker     | HR+/HER2-     | Available     | Passed | Discovery (CCGA) |
| BrCa24 | Former smoker  | HR+/HER2+     | Available     | Passed | Discovery (CCGA) |
| BrCa25 | Non-smoker     | HR-/HER2+     | Available     | Passed | Discovery (CCGA) |
| BrCa26 | Non-smoker     | TNBC          | Available     | Passed | Discovery (CCGA) |
| BrCa27 | Non-smoker     | HR+/HER2-     | Available     | Passed | Discovery (CCGA) |
| BrCa28 | Non-smoker     | TNBC          | Available     | Passed | Discovery (CCGA) |
| BrCa29 | Former smoker  | HR+/HER2-     | Available     | Passed | Discovery (CCGA) |
| BrCa30 | Non-smoker     | TNBC          | Not Available | Passed | Discovery (CCGA) |
| BrCa31 | Non-smoker     | HR+/HER2+     | Available     | Passed | Discovery (CCGA) |
| BrCa32 | Non-smoker     | HR+/HER2+     | Available     | Passed | Discovery (CCGA) |
| BrCa33 | Former smoker  | Other/missing | Available     | Passed | Discovery (CCGA) |
| BrCa34 | Non-smoker     | HR+/HER2+     | Available     | Passed | Discovery (CCGA) |
| BrCa35 | Former smoker  | HR+/HER2+     | Not Available | Passed | Discovery (CCGA) |
| BrCa36 | Former smoker  | HR+/HER2+     | Available     | Passed | Discovery (CCGA) |
| BrCa37 | Former smoker  | HR+/HER2-     | Available     | Passed | Discovery (CCGA) |
| BrCa38 | Former smoker  | HR+/HER2-     | Available     | Passed | Discovery (CCGA) |
| BrCa39 | Former smoker  | TNBC          | Available     | Passed | Discovery (CCGA) |
| BrCa40 | Former smoker  | HR+/HER2-     | Available     | Passed | Discovery (CCGA) |
| BrCa41 | Former smoker  | HR+/HER2+     | Not Available | Passed | Discovery (CCGA) |
| BrCa42 | Non-smoker     | HR-/HER2+     | Available     | Passed | Discovery (CCGA) |



|        |                |               |               |        |                  |
|--------|----------------|---------------|---------------|--------|------------------|
| BrCa43 | Former smoker  | TNBC          | Available     | Passed | Discovery (CCGA) |
| BrCa44 | Non-smoker     | HR+/HER2-     | Available     | Passed | Discovery (CCGA) |
| BrCa45 | Non-smoker     | TNBC          | Available     | Passed | Discovery (CCGA) |
| BrCa46 | Non-smoker     | TNBC          | Available     | Passed | Discovery (CCGA) |
| BrCa47 | Non-smoker     | HR+/HER2-     | Available     | Passed | Discovery (CCGA) |
| BrCa48 | Non-smoker     | Other/missing | Not Available | Passed | Validation       |
| BrCa49 | Former smoker  | Other/missing | Not Available | Passed | Validation       |
| BrCa50 | Non-smoker     | Other/missing | Not Available | Passed | Validation       |
| BrCa51 | Non-smoker     | Other/missing | Not Available | Passed | Validation       |
| BrCa52 | Non-smoker     | Other/missing | Not Available | Passed | Validation       |
| BrCa53 | Non-smoker     | Other/missing | Not Available | Passed | Validation       |
| BrCa54 | Non-smoker     | Other/missing | Not Available | Passed | Validation       |
| BrCa55 | Former smoker  | Other/missing | Not Available | Passed | Validation       |
| BrCa56 | Current smoker | Other/missing | Not Available | Passed | Validation       |
| BrCa57 | Non-smoker     | HR+/HER2+     | Not Available | Passed | Validation       |
| BrCa58 | Non-smoker     | Other/missing | Not Available | Passed | Validation       |
| BrCa59 | Former smoker  | Other/missing | Not Available | Passed | Validation       |
| BrCa60 | Former smoker  | HR+/HER2-     | Not Available | Passed | Validation       |
| BrCa61 | Non-smoker     | TNBC          | Not Available | Passed | Validation       |
| BrCa62 | Non-smoker     | TNBC          | Not Available | Passed | Validation       |
| BrCa63 | Former smoker  | HR+/HER2-     | Not Available | Passed | Validation       |
| BrCa64 | Non-smoker     | HR+/HER2-     | Not Available | Passed | Validation       |

|        |                |                        |               |        |                  |
|--------|----------------|------------------------|---------------|--------|------------------|
| BrCa65 | Non-smoker     | Other/missing          | Not Available | Passed | Validation       |
| BrCa66 | Non-smoker     | HR+                    | Not Available | Passed | Validation       |
| BrCa67 | Non-smoker     | HR+/HER2-              | Not Available | Passed | Validation       |
| BrCa68 | Current smoker | HR-/HER2+              | Not Available | Passed | Validation       |
| BrCa69 | Non-smoker     | HR+/HER2-              | Not Available | Passed | Validation       |
| BrCa70 | Non-smoker     | HR-/HER2+              | Not Available | Passed | Validation       |
| BrCa71 | Former smoker  | TNBC                   | Not Available | Passed | Validation       |
| BrCa72 | Current smoker | HR+/HER2-              | Not Available | Passed | Validation       |
| BrCa73 | Former smoker  | HR+/HER2-              | Not Available | Passed | Validation       |
| BrCa74 | Non-smoker     | HR+/HER2+              | Not Available | Passed | Validation       |
| BrCa75 | Non-smoker     | HR+/HER2-              | Not Available | Passed | Validation       |
| BrCa76 | Non-smoker     | HR+/HER2+              | Not Available | Passed | Validation       |
| BrCa77 | Non-smoker     | HR+/HER2-              | Not Available | Passed | Validation       |
| BrCa78 | Non-smoker     | Other/missing          | Not Available | Passed | Validation       |
| BrCa79 | Non-smoker     | HR+                    | Not Available | Passed | Validation       |
| BrCa80 | Non-smoker     | HR+                    | Not Available | Passed | Validation       |
| BrCa81 | Former smoker  | HR+/HER2-              | Not Available | Passed | Validation       |
| BrCa82 | Non-smoker     | HR+/HER2+              | Not Available | Failed | Validation       |
| BrCa83 | Non-smoker     | HR-                    | Not Available | Passed | Validation       |
| BrCa84 | Non-smoker     | Other/missing          | Not Available | Passed | Validation       |
| BrCa85 | Non-smoker     | Other/missing          | Not Available | Passed | Validation       |
| LuCa1  | Current smoker | Small cell lung cancer | Not Available | Passed | Discovery (CCGA) |

|        |                |                         |               |        |                  |
|--------|----------------|-------------------------|---------------|--------|------------------|
| LuCa2  | Former smoker  | Adenocarcinoma          | Not Available | Failed | Discovery (CCGA) |
| LuCa3  | Former smoker  | Adenocarcinoma          | Available     | Passed | Discovery (CCGA) |
| LuCa4  | Former smoker  | Squamous cell carcinoma | Not Available | Passed | Discovery (CCGA) |
| LuCa5  | Former smoker  | Small cell lung cancer  | Available     | Passed | Discovery (CCGA) |
| LuCa6  | Former smoker  | Carcinoid               | Available     | Passed | Discovery (CCGA) |
| LuCa7  | Former smoker  | Squamous cell carcinoma | Available     | Passed | Discovery (CCGA) |
| LuCa8  | Former smoker  | Small cell lung cancer  | Not Available | Passed | Discovery (CCGA) |
| LuCa9  | Current smoker | Other/missing           | Not Available | Passed | Discovery (CCGA) |
| LuCa10 | Current smoker | Adenocarcinoma          | Not Available | Passed | Discovery (CCGA) |
| LuCa11 | Current smoker | Small cell lung cancer  | Not Available | Passed | Discovery (CCGA) |
| LuCa12 | Former smoker  | Small cell lung cancer  | Available     | Passed | Discovery (CCGA) |
| LuCa13 | Former smoker  | Squamous cell carcinoma | Not Available | Passed | Discovery (CCGA) |
| LuCa14 | Current smoker | Small cell lung cancer  | Not Available | Passed | Discovery (CCGA) |
| LuCa15 | Former smoker  | Small cell lung cancer  | Not Available | Passed | Discovery (CCGA) |
| LuCa16 | Current smoker | Squamous cell carcinoma | Available     | Passed | Discovery (CCGA) |
| LuCa17 | Former smoker  | Adenocarcinoma          | Not Available | Passed | Discovery (CCGA) |
| LuCa18 | Current smoker | Squamous cell carcinoma | Not Available | Passed | Discovery (CCGA) |
| LuCa19 | Former smoker  | Squamous cell carcinoma | Available     | Passed | Discovery (CCGA) |
| LuCa20 | Current smoker | Small cell lung cancer  | Not Available | Failed | Discovery (CCGA) |
| LuCa21 | Former smoker  | Squamous cell carcinoma | Not Available | Passed | Discovery (CCGA) |
| LuCa22 | Former smoker  | Adenocarcinoma          | Not Available | Passed | Discovery (CCGA) |
| LuCa23 | Former smoker  | Adenocarcinoma          | Not Available | Passed | Discovery (CCGA) |

|        |                |                         |               |           |                  |
|--------|----------------|-------------------------|---------------|-----------|------------------|
| LuCa24 | Former smoker  | Squamous cell carcinoma | Not Available | Passed    | Discovery (CCGA) |
| LuCa25 | Former smoker  | Adenocarcinoma          | Available     | Available | Discovery (CCGA) |
| LuCa26 | Non-smoker     | Adenocarcinoma          | Not Available | Passed    | Discovery (CCGA) |
| LuCa27 | Current smoker | Small cell lung cancer  | Available     | Passed    | Discovery (CCGA) |
| LuCa28 | Former smoker  | Squamous cell carcinoma | Not Available | Passed    | Discovery (CCGA) |
| LuCa29 | Current smoker | Adenocarcinoma          | Not Available | Passed    | Discovery (CCGA) |
| LuCa30 | Former smoker  | Adenocarcinoma          | Not Available | Passed    | Discovery (CCGA) |
| LuCa31 | Current smoker | Adenocarcinoma          | Available     | Passed    | Discovery (CCGA) |
| LuCa32 | Former smoker  | Squamous cell carcinoma | Available     | Passed    | Discovery (CCGA) |
| LuCa33 | Former smoker  | Adenocarcinoma          | Not Available | Passed    | Validation       |
| LuCa34 | Former smoker  | Adenocarcinoma          | Not Available | Passed    | Validation       |
| LuCa35 | Former smoker  | Adenocarcinoma          | Not Available | Passed    | Validation       |
| LuCa36 | Non-smoker     | Adenocarcinoma          | Not Available | Passed    | Validation       |
| LuCa37 | Current smoker | Adenocarcinoma          | Not Available | Passed    | Validation       |
| LuCa38 | Former smoker  | Adenocarcinoma          | Not Available | Passed    | Validation       |
| LuCa39 | Former smoker  | Adenocarcinoma          | Not Available | Passed    | Validation       |
| LuCa40 | Former smoker  | Adenocarcinoma          | Not Available | Passed    | Validation       |
| LuCa41 | Current smoker | Adenocarcinoma          | Not Available | Passed    | Validation       |
| LuCa42 | Former smoker  | Adenocarcinoma          | Not Available | Passed    | Validation       |
| LuCa43 | Current smoker | Adenocarcinoma          | Not Available | Passed    | Validation       |
| LuCa44 | Former smoker  | Adenocarcinoma          | Not Available | Passed    | Validation       |
| LuCa45 | Non-smoker     | Adenocarcinoma          | Not Available | Passed    | Validation       |

|        |                |                |               |        |                  |
|--------|----------------|----------------|---------------|--------|------------------|
| LuCa46 | Non-smoker     | Adenocarcinoma | Not Available | Passed | Validation       |
| LuCa47 | Former smoker  | Adenocarcinoma | Not Available | Passed | Validation       |
| LuCa48 | Current smoker | Adenocarcinoma | Not Available | Passed | Validation       |
| LuCa49 | Former smoker  | Adenocarcinoma | Not Available | Passed | Validation       |
| LuCa50 | Former smoker  | Adenocarcinoma | Not Available | Passed | Validation       |
| NC1    | Non-smoker     | NA             | Not Available | Passed | Discovery (CCGA) |
| NC2    | Current smoker | NA             | Not Available | Failed | Discovery (CCGA) |
| NC3    | Non-smoker     | NA             | Not Available | Passed | Discovery (CCGA) |
| NC4    | Non-smoker     | NA             | Not Available | Passed | Discovery (CCGA) |
| NC5    | Former smoker  | NA             | Not Available | Passed | Discovery (CCGA) |
| NC6    | Non-smoker     | NA             | Not Available | Passed | Discovery (CCGA) |
| NC7    | Non-smoker     | NA             | Not Available | Passed | Discovery (CCGA) |
| NC8    | Non-smoker     | NA             | Not Available | Passed | Discovery (CCGA) |
| NC9    | Former smoker  | NA             | Not Available | Passed | Discovery (CCGA) |
| NC10   | Non-smoker     | NA             | Not Available | Passed | Discovery (CCGA) |
| NC11   | Non-smoker     | NA             | Not Available | Passed | Discovery (CCGA) |
| NC12   | Non-smoker     | NA             | Not Available | Passed | Discovery (CCGA) |
| NC13   | Former smoker  | NA             | Not Available | Passed | Discovery (CCGA) |
| NC14   | Former smoker  | NA             | Not Available | Passed | Discovery (CCGA) |
| NC15   | Non-smoker     | NA             | Not Available | Passed | Discovery (CCGA) |
| NC16   | Former smoker  | NA             | Not Available | Passed | Discovery (CCGA) |
| NC17   | Former smoker  | NA             | Not Available | Passed | Discovery (CCGA) |

|      |               |    |               |        |                  |
|------|---------------|----|---------------|--------|------------------|
| NC18 | Former smoker | NA | Not Available | Passed | Discovery (CCGA) |
| NC19 | Non-smoker    | NA | Not Available | Passed | Discovery (CCGA) |
| NC20 | Non-smoker    | NA | Not Available | Passed | Discovery (CCGA) |
| NC21 | Non-smoker    | NA | Not Available | Passed | Discovery (CCGA) |
| NC22 | Former smoker | NA | Not Available | Passed | Discovery (CCGA) |
| NC23 | Former smoker | NA | Not Available | Passed | Discovery (CCGA) |
| NC24 | Non-smoker    | NA | Not Available | Passed | Discovery (CCGA) |
| NC25 | Former smoker | NA | Not Available | Passed | Discovery (CCGA) |
| NC26 | Former smoker | NA | Not Available | Passed | Discovery (CCGA) |
| NC27 | Non-smoker    | NA | Not Available | Passed | Discovery (CCGA) |
| NC28 | Non-smoker    | NA | Not Available | Passed | Discovery (CCGA) |
| NC29 | Non-smoker    | NA | Not Available | Passed | Discovery (CCGA) |
| NC30 | Former smoker | NA | Not Available | Failed | Discovery (CCGA) |
| NC31 | Former smoker | NA | Not Available | Passed | Discovery (CCGA) |
| NC32 | Former smoker | NA | Not Available | Passed | Discovery (CCGA) |
| NC33 | Non-smoker    | NA | Not Available | Passed | Discovery (CCGA) |
| NC34 | Non-smoker    | NA | Not Available | Passed | Discovery (CCGA) |
| NC35 | Former smoker | NA | Not Available | Passed | Discovery (CCGA) |
| NC36 | Non-smoker    | NA | Not Available | Passed | Discovery (CCGA) |
| NC37 | Former smoker | NA | Not Available | Passed | Discovery (CCGA) |
| NC38 | Non-smoker    | NA | Not Available | Passed | Discovery (CCGA) |
| NC39 | Non-smoker    | NA | Not Available | Passed | Discovery (CCGA) |

|      |                |    |               |        |                  |
|------|----------------|----|---------------|--------|------------------|
| NC40 | Non-smoker     | NA | Not Available | Passed | Discovery (CCGA) |
| NC41 | Former smoker  | NA | Not Available | Passed | Discovery (CCGA) |
| NC42 | Non-smoker     | NA | Not Available | Passed | Discovery (CCGA) |
| NC43 | Non-smoker     | NA | Not Available | Passed | Discovery (CCGA) |
| NC44 | Non-smoker     | NA | Not Available | Passed | Discovery (CCGA) |
| NC45 | Non-smoker     | NA | Not Available | Passed | Discovery (CCGA) |
| NC46 | Former smoker  | NA | Not Available | Passed | Discovery (CCGA) |
| NC47 | Former smoker  | NA | Not Available | Passed | Discovery (CCGA) |
| NC48 | Non-smoker     | NA | Not Available | Passed | Discovery (CCGA) |
| NC49 | Former smoker  | NA | Not Available | Passed | Discovery (CCGA) |
| NC50 | Former smoker  | NA | Not Available | Passed | Discovery (CCGA) |
| NC51 | Former smoker  | NA | Not Available | Passed | Discovery (CCGA) |
| NC52 | Non-smoker     | NA | Not Available | Passed | Discovery (CCGA) |
| NC53 | Non-smoker     | NA | Not Available | Passed | Discovery (CCGA) |
| NC54 | Non-smoker     | NA | Not Available | Passed | Discovery (CCGA) |
| NC55 | Non-smoker     | NA | Not Available | Passed | Discovery (CCGA) |
| NC56 | Non-smoker     | NA | Not Available | Passed | Discovery (CCGA) |
| NC57 | Non-smoker     | NA | Not Available | Passed | Discovery (CCGA) |
| NC58 | Current smoker | NA | Not Available | Passed | Discovery (CCGA) |
| NC59 | Non-smoker     | NA | Not Available | Passed | Discovery (CCGA) |
| NC60 | Non-smoker     | NA | Not Available | Passed | Discovery (CCGA) |
| NC61 | Non-smoker     | NA | Not Available | Passed | Discovery (CCGA) |

|      |                |    |               |        |                  |
|------|----------------|----|---------------|--------|------------------|
| NC62 | Current smoker | NA | Not Available | Passed | Discovery (CCGA) |
| NC63 | Non-smoker     | NA | Not Available | Passed | Discovery (CCGA) |
| NC64 | Former smoker  | NA | Not Available | Passed | Discovery (CCGA) |
| NC65 | Current smoker | NA | Not Available | Passed | Discovery (CCGA) |
| NC66 | Former smoker  | NA | Not Available | Passed | Discovery (CCGA) |
| NC67 | Non-smoker     | NA | Not Available | Failed | Discovery (CCGA) |
| NC68 | Former smoker  | NA | Not Available | Passed | Discovery (CCGA) |
| NC69 | Non-smoker     | NA | Not Available | Passed | Discovery (CCGA) |
| NC70 | Former smoker  | NA | Not Available | Passed | Discovery (CCGA) |
| NC71 | Current smoker | NA | Not Available | Failed | Discovery (CCGA) |
| NC72 | Former smoker  | NA | Not Available | Passed | Discovery (CCGA) |
| NC73 | Former smoker  | NA | Not Available | Passed | Discovery (CCGA) |
| NC74 | Non-smoker     | NA | Not Available | Passed | Discovery (CCGA) |
| NC75 | Non-smoker     | NA | Not Available | Passed | Discovery (CCGA) |
| NC76 | Non-smoker     | NA | Not Available | Passed | Discovery (CCGA) |
| NC77 | Non-smoker     | NA | Not Available | Passed | Discovery (CCGA) |
| NC78 | Non-smoker     | NA | Not Available | Passed | Discovery (CCGA) |
| NC79 | Non-smoker     | NA | Not Available | Passed | Discovery (CCGA) |
| NC80 | Current smoker | NA | Not Available | Passed | Discovery (CCGA) |
| NC81 | Former smoker  | NA | Not Available | Passed | Discovery (CCGA) |
| NC82 | Current smoker | NA | Not Available | Passed | Discovery (CCGA) |
| NC83 | Former smoker  | NA | Not Available | Passed | Discovery (CCGA) |



|       |               |    |               |        |                  |
|-------|---------------|----|---------------|--------|------------------|
| NC84  | Non-smoker    | NA | Not Available | Passed | Discovery (CCGA) |
| NC85  | Non-smoker    | NA | Not Available | Passed | Discovery (CCGA) |
| NC86  | Non-smoker    | NA | Not Available | Passed | Discovery (CCGA) |
| NC87  | Former smoker | NA | Not Available | Passed | Discovery (CCGA) |
| NC88  | Former smoker | NA | Not Available | Passed | Discovery (CCGA) |
| NC89  | Former smoker | NA | Not Available | Passed | Discovery (CCGA) |
| NC90  | Former smoker | NA | Not Available | Passed | Discovery (CCGA) |
| NC91  | Non-smoker    | NA | Not Available | Passed | Discovery (CCGA) |
| NC92  | Former smoker | NA | Not Available | Passed | Discovery (CCGA) |
| NC93  | Non-smoker    | NA | Not Available | Passed | Discovery (CCGA) |
| NC94  | Former smoker | NA | Not Available | Passed | Validation       |
| NC95  | Non-smoker    | NA | Not Available | Passed | Validation       |
| NC96  | Former smoker | NA | Not Available | Passed | Validation       |
| NC97  | Non-smoker    | NA | Not Available | Passed | Validation       |
| NC98  | Non-smoker    | NA | Not Available | Passed | Validation       |
| NC99  | Non-smoker    | NA | Not Available | Passed | Validation       |
| NC100 | Non-smoker    | NA | Not Available | Passed | Validation       |
| NC101 | Non-smoker    | NA | Not Available | Passed | Validation       |
| NC102 | Non-smoker    | NA | Not Available | Passed | Validation       |
| NC103 | Non-smoker    | NA | Not Available | Passed | Validation       |
| NC104 | Former smoker | NA | Not Available | Passed | Validation       |
| NC105 | Non-smoker    | NA | Not Available | Passed | Validation       |

|       |                |    |               |        |            |
|-------|----------------|----|---------------|--------|------------|
| NC106 | Non-smoker     | NA | Not Available | Passed | Validation |
| NC107 | Non-smoker     | NA | Not Available | Passed | Validation |
| NC108 | Non-smoker     | NA | Not Available | Passed | Validation |
| NC109 | Non-smoker     | NA | Not Available | Passed | Validation |
| NC110 | Non-smoker     | NA | Not Available | Passed | Validation |
| NC111 | Former smoker  | NA | Not Available | Passed | Validation |
| NC112 | Non-smoker     | NA | Not Available | Passed | Validation |
| NC113 | Non-smoker     | NA | Not Available | Passed | Validation |
| NC114 | Non-smoker     | NA | Not Available | Passed | Validation |
| NC115 | Non-smoker     | NA | Not Available | Passed | Validation |
| NC116 | Non-smoker     | NA | Not Available | Passed | Validation |
| NC117 | Missing        | NA | Not Available | Passed | Validation |
| NC118 | Former smoker  | NA | Not Available | Passed | Validation |
| NC119 | Former smoker  | NA | Not Available | Passed | Validation |
| NC120 | Non-smoker     | NA | Not Available | Passed | Validation |
| NC121 | Non-smoker     | NA | Not Available | Passed | Validation |
| NC122 | Former smoker  | NA | Not Available | Passed | Validation |
| NC123 | Current smoker | NA | Not Available | Passed | Validation |
| NC124 | Non-smoker     | NA | Not Available | Passed | Validation |
| NC125 | Non-smoker     | NA | Not Available | Passed | Validation |

BrCa, breast cancer; CCGA, Circulating Cell-free Genome Atlas study (NCT02889978); HER2+/-, human epidermal growth factor receptor 2-positive/negative; HR+/-, hormone receptor positive/negative; LuCa, lung cancer; NA, not applicable; NC, non-cancer; TNBC, triple-negative breast cancer.

**Supplementary Table 6. Annotation of cell-free RNA biomarker genes**

| Gene           | CCGA Discovery Cohort |             |                | CCGA Validation Cohort |              | Differentially Expressed (vs Non-Cancer) |
|----------------|-----------------------|-------------|----------------|------------------------|--------------|------------------------------------------|
|                | Biomarker             | Cancer      | Subtype        | Median                 | Detected     |                                          |
|                | Type                  |             | Specificity    | RPM                    |              |                                          |
| <i>SLC34A2</i> | DCB                   | Lung        | Adenocarcinoma | 0                      | Detected     | Lung                                     |
| <i>GABRG1</i>  | DCB                   | Lung        | NA             | 0                      | Detected     | No                                       |
| <i>ROS1</i>    | DCB                   | Lung        | Adenocarcinoma | 0                      | Detected     | Lung                                     |
| <i>AGR2</i>    | DCB                   | Lung        | NA             | 0                      | Detected     | Lung/Breast                              |
| <i>GNAT3</i>   | DCB                   | Lung        | NA             | 0                      | Detected     | No                                       |
| <i>SFTPA2</i>  | DCB                   | Lung        | Adenocarcinoma | 0                      | Detected     | Lung                                     |
| <i>MUC5B</i>   | DCB                   | Lung        | NA             | 0                      | Detected     | Lung                                     |
| <i>SFTA3</i>   | DCB                   | Lung        | Adenocarcinoma | 0                      | Detected     | Lung                                     |
| <i>SMIM22</i>  | DCB                   | Lung        | NA             | 0                      | Detected     | Lung/Breast                              |
| <i>CXCL17</i>  | DCB                   | Lung        | Adenocarcinoma | 0                      | Detected     | Lung                                     |
| <i>BPIFA1</i>  | DCB                   | Lung        | Adenocarcinoma | 0                      | Detected     | Lung                                     |
| <i>WFDC2</i>   | DCB                   | Lung/Breast | NA             | 0                      | Detected     | Lung/Breast                              |
| <i>CSN1S1</i>  | DCB                   | Breast      | NA             | 0                      | Detected     | No                                       |
| <i>FABP7</i>   | DCB,<br>HeteroDE      | Breast      | TNBC           | 0                      | Not Detected | No                                       |

|                 |                  |        |     |    |              |             |
|-----------------|------------------|--------|-----|----|--------------|-------------|
| <i>OPN1SW</i>   | DCB              | Breast | NA  | 0  | Not Detected | No          |
| <i>SCGB2A2</i>  | DCB,<br>HeteroDE | Breast | HR+ | 0  | Detected     | Breast      |
| <i>LALBA</i>    | DCB              | Breast | NA  | 0  | Detected     | No          |
| <i>CASP14</i>   | DCB,<br>HeteroDE | Breast | NA  | 0  | Detected     | No          |
| <i>KLK5</i>     | DCB              | Breast | NA  | 0  | Detected     | No          |
| <i>CRABP2</i>   | HeteroDE         | Breast | NA  | >0 | Detected     | Lung/Breast |
| <i>VGLL1</i>    | HeteroDE         | Breast | NA  | 0  | Detected     | Lung/Breast |
| <i>SERPINB5</i> | HeteroDE         | Breast | NA  | 0  | Detected     | Lung        |
| <i>TFF1</i>     | HeteroDE         | Breast | NA  | 0  | Detected     | Lung/Breast |

---

CCGA, Circulating Cell-free Genome Atlas study (NCT02889978); cfRNA, cell-free RNA; DCB, dark channel biomarker; HeteroDE, heterogeneous differential expression; HR+, hormone receptor-positive; RPM, reads per million; TNBC, triple-negative breast cancer.

**Supplementary Table 7. Positive control genes in targeted panel**

|               |               |              |               |               |
|---------------|---------------|--------------|---------------|---------------|
| <i>AKT1</i>   | <i>MAP2K1</i> | <i>FGFR1</i> | <i>IDH1</i>   | <i>PIK3R1</i> |
| <i>BRAF</i>   | <i>NRAS</i>   | <i>FGFR2</i> | <i>IDH2</i>   | <i>MET</i>    |
| <i>CDKN2A</i> | <i>PIK3CA</i> | <i>FGFR3</i> | <i>KDR</i>    | <i>ALK</i>    |
| <i>DDR2</i>   | <i>PTEN</i>   | <i>FGFR4</i> | <i>KIT</i>    | <i>NTRK1</i>  |
| <i>EGFR</i>   | <i>STK11</i>  | <i>GNA11</i> | <i>MLH1</i>   | <i>RET</i>    |
| <i>ERBB2</i>  | <i>TP53</i>   | <i>GNAQ</i>  | <i>PDGFRA</i> | <i>FOXO1</i>  |
| <i>KRAS</i>   | <i>CSF1R</i>  | <i>HRAS</i>  | <i>PDGFRB</i> |               |
